# Supplementary material for: The Impact of the COVID-19 Pandemic and Socioeconomic Deprivation on Admissions to the Emergency Department for Psychiatric Illness: An Observational Study in a Province of Southern Italy
Source: MDPI journal article supplement (doi:10.3390/life13040943), 2023-04-03
Supplement: s1 [file s1]

## Supplementary Material

**Table S1.** Main characteristics of patients. Comparison between psychiatric access and non-psychiatric access in A&E in each pandemic phase.

| Parameter                   | Phase 1            |                        |          | Phase 2            |                       |          | Phase 3            |                       |          |
|-----------------------------|--------------------|------------------------|----------|--------------------|-----------------------|----------|--------------------|-----------------------|----------|
|                             | Psich<br>(n = 610) | nPsich<br>(n = 138273) | <i>p</i> | Psich<br>(n = 443) | nPsich<br>(n = 67959) | <i>p</i> | Psich<br>(n = 385) | nPsich<br>(n = 83640) | <i>p</i> |
| <b>Sex</b>                  |                    |                        |          |                    |                       |          |                    |                       |          |
| Male                        | 389 (63.8)         | 65510 (47.4)           | <0.001   | 278 (62.8)         | 33723 (49.6)          | <0.001   | 227 (59)           | 41823 (50)            | <0.001   |
| <b>Age</b>                  | 42 [37–55]         | 54 [34–72]             | <0.001   | 43 [33–55]         | 55 [36–73]            | <0.001   | 43 [31–59]         | 55 [36–73]            | <0.001   |
| <b>Type of access</b>       |                    |                        |          |                    |                       |          |                    |                       |          |
| Own car                     | 235 (38.5)         | 94991 (68.7)           |          | 133 (30)           | 43045 (63.3)          |          | 99 (25.7)          | 51589 (61.7)          |          |
| Ambulance                   | 370 (60.7)         | 39836 (28.8)           | <0.001   | 309 (69.8)         | 23488 (34.6)          | <0.001   | 282 (73.3)         | 30765 (36.8)          | <0.001   |
| Other                       | 5 (0.8)            | 3446 (2.5)             |          | 1 (0.2)            | 1426 (2.1)            |          | 4 (1.0)            | 1286 (1.5)            |          |
| <b>Nationality</b>          |                    |                        |          |                    |                       |          |                    |                       |          |
| Italy                       | 591 (97.2)         | 134388 (97.4)          | 0.6994   | 435 (98.2)         | 65941 (97.4)          | 0.3695   | 369 (96.3)         | 81160 (97.4)          | 0.2022   |
| Foreign                     | 17 (2.8)           | 3552 (2.6)             |          | 8 (1.8)            | 1793 (2.7)            |          | 14 (3.7)           | 2206 (2.7)            |          |
| <b>Discharge</b>            |                    |                        |          |                    |                       |          |                    |                       |          |
| Dead in A&E                 | 0 (0)              | 158 (0.1)              |          | 0 (0)              | 169 (0.3)             |          | 1 (0.3)            | 238 (0.3)             |          |
| Recovery                    | 93 (15.3)          | 23546 (17)             |          | 66 (14.9)          | 13364 (19.7)          |          | 82 (21.3)          | 17042 (20.4)          |          |
| Refused hospitaliz.         | 22 (3.6)           | 4142 (3)               | <0.001   | 9 (2)              | 2139 (3.2)            | <0.001   | 16 (4.2)           | 2316 (2.8)            | <0.001   |
| Home discharged             | 396 (64.9)         | 100995 (73)            |          | 300 (67.7)         | 47337 (69.7)          |          | 188 (48.8)         | 56130 (67.1)          |          |
| Other                       | 99 (16.2)          | 9432 (6.8)             |          | 68 (15.4)          | 4950 (7.3)            |          | 98 (25.5)          | 7914 (9.5)            |          |
| <b>Class of Deprivation</b> |                    |                        |          |                    |                       |          |                    |                       |          |
| H (<-0.596)                 | 104 (17.1)         | 37767 (27.3)           |          | 68 (15.4)          | 18349 (27)            |          | 79 (20.5)          | 21517 (40.2)          |          |
| M (-0.596 to -0.194)        | 102 (16.7)         | 30018 (21.7)           | <0.001   | 54 (12.2)          | 14579 (21.5)          | <0.001   | 57 (14.8)          | 18470 (12)            | <0.001   |
| L (-0.194 to 0.341)         | 38 (6.2)           | 15613 (11.3)           |          | 34 (7.7)           | 7533 (11.1)           |          | 32 (8.3)           | 10060 (22.1)          |          |
| VL (>=0.341)                | 366 (60)           | 54875 (39.7)           |          | 287 (64.8)         | 27498 (40.5)          |          | 217 (56.4)         | 33593 (25.7)          |          |

Data are shown as n (%) or Median [IQR]; Psich: Psychiatric illness in A&E; nPsich: Non-Psychiatric illness in A&E; H, high DI; M, medium DI; L, low DI; VL, very low DI; phase 1: pre pandemic period, phase 2: pandemic period during 2020, phase 3: pandemic period during 2021.

**Table S2.** Correlation between the municipalities incidence of access for a psychiatric disease (IPd) in A&E and deprivation index during the three phases.

| Municipality               | DI class | DI    | Ip d    |         |         |
|----------------------------|----------|-------|---------|---------|---------|
|                            |          |       | Phase 1 | Phase 2 | Phase 3 |
| Maruggio                   | High     | -1.50 | 0.7     | 0.0     | 0.0     |
| Torricella                 |          | -1.37 | 3.3     | 1.6     | 1.5     |
| Fragagnano                 |          | -1.20 | 1.8     | 0.0     | 0.0     |
| Leporano                   |          | -1.19 | 0.0     | 0.0     | 0.0     |
| Avetrana                   |          | -1.03 | 2.0     | 2.9     | 1.5     |
| Crispano                   |          | -0.98 | 0.6     | 1.3     | 0.5     |
| Roccaforzata               |          | -0.98 | 0.0     | 0.0     | 0.0     |
| Monteiasi                  |          | -0.90 | 0.0     | 0.0     | 0.0     |
| Manduria                   |          | -0.80 | 2.3     | 2.3     | 2.4     |
| Carosino                   |          | -0.76 | 1.0     | 0.0     | 0.0     |
| San Marzano Di S. Giuseppe |          | -0.68 | 1.4     | 2.5     | 4.8     |
| Martina Franca             |          | -0.60 | 0.5     | 0.3     | 1.0     |
| Lizzano                    |          | -0.59 | 1.2     | 0.0     | 0.7     |
| Sava                       |          | -0.59 | 2.8     | 2.2     | 0.9     |
| San Giorgio Ionico         | Medium   | -0.58 | 3.0     | 1.5     | 1.7     |
| Castellaneta               |          | -0.57 | 1.0     | 1.5     | 0.9     |
| Montemesola                |          | -0.53 | 0.0     | 2.5     | 0.0     |
| Palagiano                  |          | -0.51 | 0.7     | 1.0     | 0.3     |
| Faggiano                   |          | -0.50 | 0.0     | 2.8     | 4.5     |
| Pulsano                    |          | -0.42 | 0.5     | 0.9     | 2.2     |
| Mottola                    |          | -0.30 | 0.4     | 1.4     | 0.0     |
| Grottaglie                 |          | -0.23 | 1.6     | 1.7     | 1.8     |
| Laterza                    | Low      | -0.19 | 0.6     | 2.1     | 0.5     |
| Ginosa                     |          | -0.11 | 0.7     | 1.9     | 2.9     |
| Massafra                   |          | -0.09 | 0.5     | 1.0     | 1.5     |
| Monteparano                |          | -0.02 | 2.2     | 7.3     | 0.0     |
| Palagianello               | Very low | 0.08  | 2.2     | 3.6     | 0.0     |
| Taranto                    |          | 0.34  | 2.5     | 2.4     | 2.0     |
| Statte                     |          | 0.83  | 1.5     | 2.9     | 1.7     |

Ip d, Incidence of psychiatric access; DI, deprivation index. Spearman Correlation (r) between IPd and DI. During phase 1  $r = 0.07$ ,  $p$ -value = 0.735; during phase 2  $r = 0.54$ ,  $p$ -value = 0.03; during phase 3  $r = 0.26$ ,  $p$ -value = 0.17.
